# Supplementary material
Source: ML conference proceedings conference paper supplement (https://www.ecva.net/papers/eccv_2020/papers_ECCV/html/123680443_ECCV_2020_paper.php)
Supplement: Supplementary file 7 [file 123680443-supp.zip]

Archive with 41 entries (39 files):
- eecv2020_camera_ready/
- __MACOSX/._eecv2020_camera_ready
- eecv2020_camera_ready/eijkel2.eps
- __MACOSX/eecv2020_camera_ready/._eijkel2.eps
- eecv2020_camera_ready/4353-supp.pdf
- __MACOSX/eecv2020_camera_ready/._4353-supp.pdf
- eecv2020_camera_ready/splncs04.bst
- __MACOSX/eecv2020_camera_ready/._splncs04.bst
- eecv2020_camera_ready/ruler.sty
- __MACOSX/eecv2020_camera_ready/._ruler.sty
- eecv2020_camera_ready/egbib.bib
- __MACOSX/eecv2020_camera_ready/._egbib.bib
- eecv2020_camera_ready/4353-supp.bbl
- __MACOSX/eecv2020_camera_ready/._4353-supp.bbl
- eecv2020_camera_ready/images/
- eecv2020_camera_ready/4353-supp.tex
- __MACOSX/eecv2020_camera_ready/._4353-supp.tex
- eecv2020_camera_ready/comment.sty
- __MACOSX/eecv2020_camera_ready/._comment.sty
- eecv2020_camera_ready/llncs.cls
- __MACOSX/eecv2020_camera_ready/._llncs.cls
- eecv2020_camera_ready/README.txt
- __MACOSX/eecv2020_camera_ready/._README.txt
- eecv2020_camera_ready/history.txt
- __MACOSX/eecv2020_camera_ready/._history.txt
- eecv2020_camera_ready/eijkel2.pdf
- __MACOSX/eecv2020_camera_ready/._eijkel2.pdf
- eecv2020_camera_ready/llncsdoc.pdf
- __MACOSX/eecv2020_camera_ready/._llncsdoc.pdf
- eecv2020_camera_ready/images/qr2_new.pdf
- __MACOSX/eecv2020_camera_ready/images/._qr2_new.pdf
- eecv2020_camera_ready/images/4353-supp.bbl
- __MACOSX/eecv2020_camera_ready/images/._4353-supp.bbl
- eecv2020_camera_ready/images/eccv_proposal.pdf
- __MACOSX/eecv2020_camera_ready/images/._eccv_proposal.pdf
- eecv2020_camera_ready/images/lesion_v1.png
- __MACOSX/eecv2020_camera_ready/images/._lesion_v1.png
- eecv2020_camera_ready/images/holes1_new.pdf
- __MACOSX/eecv2020_camera_ready/images/._holes1_new.pdf
- eecv2020_camera_ready/images/phnn2.pdf
- __MACOSX/eecv2020_camera_ready/images/._phnn2.pdf
