# Supplementary material
Source: ML conference proceedings conference paper supplement (https://www.ecva.net/papers/eccv_2020/papers_ECCV/html/123680443_ECCV_2020_paper.php)
Supplement: Supplementary file 7 [file 123680443-supp.zip › eecv2020_camera_ready/4353-supp.tex]

% updated April 2002 by Antje Endemann
% Based on CVPR 07 and LNCS, with modifications by DAF, AZ and elle, 2008 and AA, 2010, and CC, 2011; TT, 2014; AAS, 2016; AAS, 2020

\documentclass[runningheads]{llncs}
\usepackage{graphicx}
% DO NOT USE \usepackage{times}, it will be removed by typesetters
%\usepackage{times}

\usepackage{tikz}
\usepackage{comment} 
\usepackage{amsmath,amssymb} % define this before the line numbering.
\usepackage{color}
\usepackage{graphicx}
\usepackage{comment}
\usepackage{amsmath,amssymb} % define this before the line numbering.
\usepackage{color}
\usepackage{float}
\usepackage{epsfig}
\usepackage{graphicx}
\usepackage{amsmath}
\usepackage{amssymb}
\usepackage{mwe}
\usepackage{xcolor,colortbl}
\usepackage{tabularx}
\usepackage{multirow}
\usepackage{relsize}
\usepackage{pifont}
\usepackage{multirow}
\usepackage{adjustbox}
\usepackage{acro}

% INITIAL SUBMISSION - The following two lines are NOT commented
% CAMERA READY - Comment OUT the following two lines
%\usepackage{ruler}
%\usepackage[width=122mm,left=12mm,paperwidth=146mm,height=193mm,top=12mm,paperheight=217mm]{geometry}

\DeclareAcronym{CT}{
short=CT,
long=computed tomography,
long-plural-form = computed tomographies,
 foreign-plural={}
}

\DeclareAcronym{ASSD}{
short=ASSD,
long=average symmetric surface distance
}

\DeclareAcronym{ICC}{
short=ICC,
long=intrahepatic cholangiocellular carcinoma
}

\DeclareAcronym{HCC}{
short=HCC,
long=hepatocellular carcinoma
}


\DeclareAcronym{HeMIS}{
short=HeMIS,
long=hetero-modality image segmentation
}

\DeclareAcronym{PACS}{
short=PACS,
long=picture archiving and communication system,
 foreign-plural = {}
}

\DeclareAcronym{TACE}{
short=TACE,
long=transarterial chemoembolization
}
\DeclareAcronym{CGMH}{
short=CGMH,
long=Chang Gung Memorial Hospital
}
\DeclareAcronym{ADA}{
short=ADA,
long=adversarial domain adaptation
}

\DeclareAcronym{PET}{
short=PET,
long=positron emission tomography
}
\DeclareAcronym{FCN}{
short=FCN,
long=fully convolutional network,
 foreign-plural = {}
}

\DeclareAcronym{A}{
short=A,
long=arterial
}
\DeclareAcronym{SGD}{
short=SGD,
long=stochastic gradient descent
}
\DeclareAcronym{V}{
short=V,
long=venous
}

\DeclareAcronym{JSD}{
short=JSD,
long=Jensen-Shannon divergence
}

\DeclareAcronym{D}{
short=D,
long=delay
}

\DeclareAcronym{NC}{
short=NC,
long=non-contrast
}

\DeclareAcronym{CHASe}{
short=CHASe,
long=co-heterogenous and adaptive segmentation
}

\DeclareAcronym{DSC}{
short=DSC,
long=Dice-S\o{}rensen coefficient,
 foreign-plural={}
}

\DeclareAcronym{PHNN}{
short=PHNN,
long=progressive holistically nested network
}
\DeclareAcronym{ASPP}{
short=ASPP,
long=atrous spatial pyramid pooling
}

\newcommand{\NC}{\mathit{NC}}
\newcommand{\cmark}{\ding{51}}
\newcommand{\xmark}{\ding{54}}
\newcommand*\rot{\rotatebox{90}}
\newcommand{\Sec}{Sec.}
\newcommand{\Tab}{Table}
\newcommand{\Fig}{Figure}
\newcommand{\eg}{\textit{e.g.},}
\newcommand{\ie}{\textit{i.e.},}
\newcommand{\etal}{\textit{et al.}}

\begin{document}
% \renewcommand\thelinenumber{\color[rgb]{0.2,0.5,0.8}\normalfont\sffamily\scriptsize\arabic{linenumber}\color[rgb]{0,0,0}}
% \renewcommand\makeLineNumber {\hss\thelinenumber\ \hspace{6mm} \rlap{\hskip\textwidth\ \hspace{6.5mm}\thelinenumber}}
% \linenumbers
\pagestyle{headings}
\mainmatter
\def\ECCVSubNumber{4353}  % Insert your submission number here

\title{Co-Heterogeneous and Adaptive Segmentation from Multi-Source and Multi-Phase CT Imaging Data: A Study on Pathological Liver and Lesion Segmentation - Supplementary material} % Replace with your title

% INITIAL SUBMISSION 
\begin{comment}
\titlerunning{ECCV-20 submission ID \ECCVSubNumber} 
\authorrunning{ECCV-20 submission ID \ECCVSubNumber} 
\author{Anonymous ECCV submission}
\institute{Paper ID \ECCVSubNumber}
\end{comment}
%******************

% CAMERA READY SUBMISSION
%\begin{comment}
\titlerunning{CHASe: Co-Heterogeneous and Adaptive Segmentation}
% If the paper title is too long for the running head, you can set
% an abbreviated paper title here
%
\author{Ashwin Raju\inst{1,2} \and
Chi-Tung Cheng\inst{3} \and
Yuankai Huo\inst{1} \and
Jinzheng Cai\inst{1} \and
Junzhou Huang\inst{2} \and
Jing Xiao\inst{4} \and
Le Lu\inst{1} \and
ChienHung Liao\inst{3}\and
Adam P. Harrison\inst{1}}
%
\authorrunning{A. Raju et al.}
% First names are abbreviated in the running head.
% If there are more than two authors, 'et al.' is used.
%
\institute{PAII Inc., Bethesda MD, USA \and
The University of Texas at Arlington, Arlington TX, USA \and
Chang Gung Memorial Hospital, Linkou, Taiwan, ROC\and
PingAn Technology, Shenzhen, China
}
%\end{comment}
%******************
\maketitle

\section{Methodology Figures}

Figures~\ref{fig:phnn} and \ref{fig:holes} depict the \ac{PHNN} architecture and our holes-based pseudo-labeling, respectively. 

\begin{figure}
\center
      \includegraphics[width=75mm]{images/phnn2.pdf}
    \caption{\small \textbf{PHNN architecture.} Here we use the \acs{V}-phase pathway coloring from \Fig~\ref{fig:system}. At each backbone stage, deeply supervised predictions and losses are calculated. Similar to residual-style connections~\cite{He2015DeepRL}, each stage's predictions are built off the prior one's using addition.}
     \label{fig:phnn}
\end{figure}

\begin{figure}
\center
      \includegraphics[width=\linewidth]{images/holes1_new.pdf}
    \caption{\small \textbf{Hole-Based Pseudo-Labelling.} 3D holes greater than $100$ voxels are extracted as lesion pseudo-masks missed by the prediction. Regions outside the hole are ignored. The third liver slice from left shows a \ac{TACE}-treated lesion, which is not seen in public datasets.}
     \label{fig:holes}
\end{figure}


\section{Implementation details}

\subsection{Network training}

We first initialize \ac{CHASe} with the weights trained on supervised venous phase data from the public datasets. To train this segmentation network, we use the Adam optimizer~\cite{DBLP:journals/corr/KingmaB14} with an initial learning rate of $3 \times 10^{-4}$ and values of $0.9$ and $0.99$ for the $\beta_{1}$ and $\beta_{2}$ hyperparamters, respectively. We reduce learning rateswhen the validation accuracy does not improve for $10$ epochs using a factor of $0.1$. 

To train \ac{CHASe}, we use the \ac{SGD} optimizer with an initial learning rate of $1 \times 10^{-5}$ and a momentum of $0.9$. We reduce the learning rate when the validation loss does not reduce for $10$ epochs using a factor of $0.1$. 

For training the discriminator, we use the Adam optimizer with an initial learning rate of $3 \times 10^{-4}$ and reduce the learning rate with a polynomial decay schedule with a power of $0.9$ as specified in~\cite{tsai2018learning}. 

We augment the dataset in both source and target domain by performing random rotation, random elastic deformation, gamma correction and random scaling.
\section{Additional Results}
\Tab~\ref{tbl:combi} shows the performance of different models on the test dataset using all $15$ possible combinations of phases during inference. For H-DenseUNet, Baseline, Co-training, which do not naturally accept multi-channel inputs, we perform majority voting across the appropriate single-phase predictions. 

%The results from \Tab~\ref{tbl:combi} shows that the performance of \ac{CHASe} is better than the other models in $14$ combinations.
\begin{table}
\caption{\textbf{Data distribution for $\mathcal{D}_{\ell}$.} Each dataset shows whether it contains only healthy liver or pathological liver and the number of volumes.}	
	\begin{center}		
		\begin{tabular}{ |p{2.1cm}|>{\centering}p{2.1cm}|>{\centering\arraybackslash}p{2.1cm}|>{\centering\arraybackslash}p{2.1cm}|}\hline
			{\bfseries Dataset ($\mathcal{D}_{\ell})$} & {\bfseries Total} & {\bfseries Healthy} & {\bfseries Pathological liver} \\ \hline
			LiTS & 130 &    & \cmark \\ \hline
			CHAOS  & 40 & \cmark & \\ \hline
			3D-IRCADb & 20 &   & \cmark\\ \hline
		    Gibson & 35 &   & \cmark \\ \hline
			Sliver07 & 20 & \cmark & \\ \hline
		\end{tabular}
	\end{center}
\label{tab:source_dataset_distribution}
\end{table}

\begin{table}[]
\caption{\textbf{Combination of views.} Mean \acp{DSC} are tabulated across different combinations of contrast phases used for input. The number of samples are indicated in parentheses. \cmark \hspace{0.05cm} signifies the presence of a phase and \xmark \hspace{0.05cm} represents the absence of a phase. }
\begin{tabular}{|llrl|llllll|}
\hline
\multicolumn{4}{|c|}{Multi-phases (90) } & \multicolumn{6}{c|}{Models}   \\ \hline
\multicolumn{1}{|c}{\rot{Non-contrast}} & \multicolumn{1}{c}{\rot{Arterial}} & \multicolumn{1}{c}{\rot{Venous}} & \multicolumn{1}{c|}{\rot{Delay}} & \multicolumn{1}{|c}{\rot{H-DenseUNet}} & \multicolumn{1}{c}{\rot{Baseline}} & \multicolumn{1}{c}{\rot{Co-training}} & \multicolumn{1}{c}{\rot{Co-hetero}} & \multicolumn{1}{c}{\rot{Cohetero w ADA}} & \multicolumn{1}{c|}{\rot{CHASe}} \\ \cline{1-10}
\xmark & \xmark  & \xmark & \cmark &85.7  &86.4  &92.9 &93.8  &94.0  &\textbf{94.3} \\ \cline{1-10}
\xmark & \xmark  & \cmark & \xmark & 90.9 &90.7  &93.7 &94.5  &94.9  &\textbf{95.0} \\ \cline{1-10}
\xmark & \xmark  & \cmark & \cmark & 90.5 &90.9  &93.8 &94.7  &\textbf{94.9}  &94.8 \\ \cline{1-10}
\xmark & \cmark  & \xmark & \xmark &90.8  &91.1  &93.6 &94.1  &94.3  &\textbf{94.6} \\ \cline{1-10}
\xmark & \cmark  & \xmark & \cmark &91.1  &91.3  &93.1 &94.6  &94.9  &\textbf{95.1} \\ \cline{1-10}
\xmark & \cmark  & \cmark & \xmark &91.9  &91.8  &92.9 &94.8  &94.8  &\textbf{95.0} \\ \cline{1-10}
\xmark & \cmark  & \cmark & \cmark &91.4  &91.6  &93.5 &95.0  &\textbf{95.2}  &\textbf{95.2} \\ \cline{1-10}
\cmark & \xmark  & \xmark & \xmark &85.6  &85.9  &92.4 &93.5  &93.8  &\textbf{94.0} \\ \cline{1-10}
\cmark & \xmark  & \xmark & \cmark &90.4  &90.7  &92.6 &93.8  &94.0  &\textbf{94.1} \\ \cline{1-10}
\cmark & \xmark  & \cmark & \xmark &91.1  &91.8  &93.4 &94.9  &95.1  &\textbf{95.2}\\ \cline{1-10}
\cmark & \xmark  & \cmark & \cmark &91.2  &92.0  &94.1 &94.8  &95.0  &\textbf{95.4}\\ \cline{1-10}
\cmark & \cmark  & \xmark & \xmark &90.9  &91.6  &93.7 &94.9  &94.8  &\textbf{95.0} \\ \cline{1-10}
\cmark & \cmark  & \xmark & \cmark &91.6  &91.4  &94.3 &95.0  &95.0  &\textbf{95.2} \\ \cline{1-10}
\cmark & \cmark  & \cmark & \xmark &91.5  &91.9  &94.4 &95.0  &95.1  &\textbf{95.3} \\ \cline{1-10}
\cmark & \cmark  & \cmark & \cmark &91.6  &92.1  &94.5 &95.1  &95.4  &\textbf{95.7} \\ \cline{1-10}
\end{tabular}
\label{tbl:combi}

\end{table}


\Tab~\ref{tbl:cgmh_ablation} provides the ablation study results when VGG16 is used as backbone. As can be seen, the results exhibit identical trends as when using a ResNet50-based DeepLabv2 backbone, except that absolute numbers are slightly worse. Nonetheless, even with an older backbone \ac{CHASe} is able to provide excellent results. 


\begin{table*}[t]
\caption{\textbf{Pathological Liver Segmentation.} Mean \acs{DSC} and \acs{ASSD} results on the Anonymized \acs{PACS} dataset are tabulated across different contrast phase inputs. For ``All'', all available phases in the \ac{CT} study are used as input. Number of samples are indicated in parentheses. The segmentation model is trained with VGG16 backbone.}

\small
\begin{center}


\begin{tabular}{|l|l|ll|ll|ll|ll|ll|}
\hline
\multicolumn{2}{|c|}{\multirow{2}{*}{Models}} & \multicolumn{2}{c|}{NC (96)}                             & \multicolumn{2}{c|}{A (98)}         & \multicolumn{2}{c|}{V (97)}         & \multicolumn{2}{c|}{D (98)}         & \multicolumn{2}{c|}{All (100)}       \\ \cline{3-12} 
\multicolumn{2}{|c|}{}                        & \multicolumn{1}{c|}{DSC} & \multicolumn{1}{c|}{ASSD} & \multicolumn{1}{c|}{DSC} & ASSD & \multicolumn{1}{c|}{DSC} & ASSD & \multicolumn{1}{l|}{DSC} & ASSD & \multicolumn{1}{l|}{DSC} & ASSD \\ \hline
\multicolumn{2}{|l|}{HDenseUNet}              &                          85.2&3.25                        &90.1&2.19
&90.7&2.61       &85.2&2.91     &                          89.9&2.59     \\
\multicolumn{2}{|l|}{Baseline}                &                          85.1&2.81                          &                         90.1 &1.33     &                         90.2 &1.21     &                          86.9&2.03    &                          90.9&1.25     \\
\multicolumn{2}{|l|}{Baseline w pseudo}          &                          87.4&1.47                          &                          90.3&1.37     &          90.8&1.13     &                          91.1&1.12     &                          91.7&1.23    \\
\multicolumn{2}{|l|}{Baseline w ADA}            &                         88.3&1.38                          &                          91.2&1.08     &                          91.1&1.12     &                          92.1&0.99     &                         92.4&1.01    \\
\multicolumn{2}{|l|}{Co-training}             &                     91.8&1.03                        &                     92.5&1.01    &                     92.9&0.95    &                          92.5&1.02     &                         93.8&0.99     \\
\multicolumn{2}{|l|}{Co-hetero}&                          93.1&0.95                          &                          93.3&0.95     &                         94.0&0.80     &                     93.1&1.06     &                         94.6 &0.73     \\
\multicolumn{2}{|l|}{Co-hetero w ADA}&                       93.4&0.89                         &                         93.6&0.85    &                     \textbf{94.3}&0.74    &                         93.6&0.91     &                         94.7&0.73    \\
\multicolumn{2}{|l|}{CHASe}&                        \textbf{93.7}&\textbf{0.82}                        &                          \textbf{93.8}&\textbf{0.83}     &                             94.2&\textbf{0.73}    &                                     \textbf{93.8}&\textbf{0.87}     &                        \textbf{95.0}&\textbf{0.70}     \\ \hline
\end{tabular}

 \end{center}{}
 \label{tbl:cgmh_ablation}
 
\end{table*}


\begin{figure*}[t]
\begin{center}
        \includegraphics[width=.9\linewidth]{images/lesion_v1.png}
\end{center}
\caption{Box-and-whisker plots of lesion scores on the public dataset. \acp{DSC} of $1.0$ and near $0.0$ are possible, as many studies had no lesions present. If the model did not predict any lesions, it yielded perfect \acp{DSC}. Conversely, predictions of any lesion when none are present penalize scores very heavily. }
\label{fig:system}
\end{figure*}

\Fig~\ref{fig:system} depicts a box-and-whisker plot of the lesion \ac{DSC} scores on the public dataset. As can be seen, all components of \ac{CHASe} contribute to higher performance.  Although the mean scores of \ac{CHASe} were lower when using the holes-based pseudo-labeling (see main text), the figure demonstrates that the median values are higher, with a tighter spread of quartile values. 

\begin{figure*}[t]
\begin{center}
        \includegraphics[width=\linewidth]{images/qr2_new.pdf}
\end{center}
\caption{\small \textbf{Qualitative results.}  {\bf Green} and {\bf red} curves depict the ground truth and segmentation predictions, respectively. All predictions executed with all phases used as input. The first and last rows depict failure cases, where the latter is an extremely challenging case with an extraordinarily large lesion occupying much of the liver space. \ac{CHASe} still manages to provide superior results compared to the alternatives. The second row demonstrates \ac{CHASe}'s ability to account for TACE-treated lesions, which are not present in public datasets. The fourth row depicts another highly challenging case, where the gallbladder is difficult to distinguish from a lesion. As can be seen, \ac{CHASe} is the only model able to successfully differentiate these two structures.}
\label{fig:results}

\end{figure*}

\Fig~\ref{fig:results} depicts additional qualitative results demonstrating the visual improvements provided by \ac{CHASe}. 

\bibliographystyle{splncs04}
\bibliography{egbib}
\end{document}
