# Supplementary material
Source: ML conference proceedings conference paper supplement (https://www.ecva.net/papers/eccv_2020/papers_ECCV/html/123680443_ECCV_2020_paper.php)
Supplement: Supplementary file 7 [file 123680443-supp.zip › eecv2020_camera_ready/egbib.bib]

@inproceedings{harrison2017progressive,
  title={Progressive and multi-path holistically nested neural networks for pathological lung segmentation from CT images},
  author={Harrison, Adam P and Xu, Ziyue and George, Kevin and Lu, Le and Summers, Ronald M and Mollura, Daniel J},
  booktitle={International Conference on Medical Image Computing and Computer-Assisted Intervention},
  pages={621--629},
  year={2017},
  organization={Springer}
}
@misc{li2019decoupled,
    title={Decoupled Certainty-Driven Consistency Loss for Semi-supervised Learning},
    author={Yiting Li and Lu Liu and Robby T. Tan},
    year={2019},
    eprint={1901.05657},
    archivePrefix={arXiv},
    primaryClass={cs.CV}
}


@InProceedings{Wang_2019b,
author="Wang, Xudong
and Han, Shizhong
and Chen, Yunqiang
and Gao, Dashan
and Vasconcelos, Nuno",
editor="Shen, Dinggang
and Liu, Tianming
and Peters, Terry M.
and Staib, Lawrence H.
and Essert, Caroline
and Zhou, Sean
and Yap, Pew-Thian
and Khan, Ali",
title="Volumetric Attention for 3D Medical Image Segmentation and Detection",
booktitle="Medical Image Computing and Computer Assisted Intervention -- MICCAI 2019",
year="2019",
publisher="Springer International Publishing",
address="Cham",
pages="175--184",
abstract="A volumetric attention (VA) module for 3D medical image segmentation and detection is proposed. VA attention is inspired by recent advances in video processing, enables 2.5D networks to leverage context information along the z direction, and allows the use of pretrained 2D detection models when training data is limited, as is often the case for medical applications. Its integration in the Mask R-CNN is shown to enable state-of-the-art performance on the Liver Tumor Segmentation (LiTS) Challenge, outperforming the previous challenge winner by 3.9 points and achieving top performance on the LiTS leader board at the time of paper submission. Detection experiments on the DeepLesion dataset also show that the addition of VA to existing object detectors enables a 69.1 sensitivity at 0.5 false positive per image, outperforming the best published results by 6.6 points.",
isbn="978-3-030-32226-7"
}


@InProceedings{Cai_2018,
author="Cai, Jinzheng
and Tang, Youbao
and Lu, Le
and Harrison, Adam P.
and Yan, Ke
and Xiao, Jing
and Yang, Lin
and Summers, Ronald M.",
editor="Frangi, Alejandro F.
and Schnabel, Julia A.
and Davatzikos, Christos
and Alberola-L{\'o}pez, Carlos
and Fichtinger, Gabor",
title="Accurate Weakly-Supervised Deep Lesion Segmentation Using Large-Scale Clinical Annotations: Slice-Propagated 3D Mask Generation from 2D RECIST",
booktitle="Medical Image Computing and Computer Assisted Intervention -- MICCAI 2018",
year="2018",
publisher="Springer International Publishing",
address="Cham",
pages="396--404",
abstract="Volumetric lesion segmentation from computed tomography (CT) images is a powerful means to precisely assess multiple time-point lesion/tumor changes. However, because manual 3D segmentation is prohibitively time consuming, current practices rely on an imprecise surrogate called response evaluation criteria in solid tumors (RECIST). Despite their coarseness, RECIST markers are commonly found in current hospital picture and archiving systems (PACS), meaning they can provide a potentially powerful, yet extraordinarily challenging, source of weak supervision for full 3D segmentation. Toward this end, we introduce a convolutional neural network (CNN) based weakly supervised slice-propagated segmentation (WSSS) method to (1) generate the initial lesion segmentation on the axial RECIST-slice; (2) learn the data distribution on RECIST-slices; (3) extrapolate to segment the whole lesion slice by slice to finally obtain a volumetric segmentation. To validate the proposed method, we first test its performance on a fully annotated lymph node dataset, where WSSS performs comparably to its fully supervised counterparts. We then test on a comprehensive lesion dataset with 32,735 RECIST marks, where we report a mean Dice score of 92{\%} on RECIST-marked slices and 76{\%} on the entire 3D volumes.",
isbn="978-3-030-00937-3"
}

@InProceedings{Jin_2019b,
author="Jin, Dakai
and Guo, Dazhou
and Ho, Tsung-Ying
and Harrison, Adam P.
and Xiao, Jing
and Tseng, Chen-kan
and Lu, Le",
editor="Shen, Dinggang
and Liu, Tianming
and Peters, Terry M.
and Staib, Lawrence H.
and Essert, Caroline
and Zhou, Sean
and Yap, Pew-Thian
and Khan, Ali",
title="Accurate Esophageal Gross Tumor Volume Segmentation in PET/CT Using Two-Stream Chained 3D Deep Network Fusion",
booktitle="Medical Image Computing and Computer Assisted Intervention -- MICCAI 2019",
year="2019",
publisher="Springer International Publishing",
address="Cham",
pages="182--191",
abstract="Gross tumor volume (GTV) segmentation is a critical step in esophageal cancer radiotherapy treatment planning. Inconsistencies across oncologists and prohibitive labor costs motivate automated approaches for this task. However, leading approaches are only applied to radiotherapy computed tomography (RTCT) images taken prior to treatment. This limits the performance as RTCT suffers from low contrast between the esophagus, tumor, and surrounding tissues. In this paper, we aim to exploit both RTCT and positron emission tomography (PET) imaging modalities to facilitate more accurate GTV segmentation. By utilizing PET, we emulate medical professionals who frequently delineate GTV boundaries through observation of the RTCT images obtained after prescribing radiotherapy and PET/CT images acquired earlier for cancer staging. To take advantage of both modalities, we present a two-stream chained segmentation approach that effectively fuses the CT and PET modalities via early and late 3D deep-network-based fusion. Furthermore, to effect the fusion and segmentation we propose a simple yet effective progressive semantically nested network (PSNN) model that outperforms more complicated models. Extensive 5-fold cross-validation on 110 esophageal cancer patients, the largest analysis to date, demonstrates that both the proposed two-stream chained segmentation pipeline and the PSNN model can significantly improve the quantitative performance over the previous state-of-the-art work by {\$}{\$}11{\backslash}{\%}{\$}{\$}in absolute Dice score (DSC) (from {\$}{\$}0.654{\backslash}, {\backslash}pm {\backslash}, 0.210{\$}{\$}to {\$}{\$}0.764{\backslash}, {\backslash}pm {\backslash}, 0.134{\$}{\$}) and, at the same time, reducing the Hausdorff distance from {\$}{\$}129{\backslash}pm 73{\$}{\$} mm to {\$}{\$}47 {\backslash}pm 56{\$}{\$} mm.",
isbn="978-3-030-32245-8"
}

@InProceedings{Jin_2019a,
author="Jin, Dakai
and Guo, Dazhou
and Ho, Tsung-Ying
and Harrison, Adam P.
and Xiao, Jing
and Tseng, Chen-kan
and Lu, Le",
editor="Shen, Dinggang
and Liu, Tianming
and Peters, Terry M.
and Staib, Lawrence H.
and Essert, Caroline
and Zhou, Sean
and Yap, Pew-Thian
and Khan, Ali",
title="Deep Esophageal Clinical Target Volume Delineation Using Encoded 3D Spatial Context of Tumors, Lymph Nodes, and Organs At Risk",
booktitle="Medical Image Computing and Computer Assisted Intervention -- MICCAI 2019",
year="2019",
publisher="Springer International Publishing",
address="Cham",
pages="603--612",
abstract="Clinical target volume (CTV) delineation from radiotherapy computed tomography (RTCT) images is used to define the treatment areas containing the gross tumor volume (GTV) and/or sub-clinical malignant disease for radiotherapy (RT). High intra- and inter-user variability makes this a particularly difficult task for esophageal cancer. This motivates automated solutions, which is the aim of our work. Because CTV delineation is highly context-dependent---it must encompass the GTV and regional lymph nodes (LNs) while also avoiding excessive exposure to the organs at risk (OARs)---we formulate it as a deep contextual appearance-based problem using encoded spatial contexts of these anatomical structures. This allows the deep network to better learn from and emulate the margin- and appearance-based delineation performed by human physicians. Additionally, we develop domain-specific data augmentation to inject robustness to our system. Finally, we show that a simple 3D progressive holistically nested network (PHNN), which avoids computationally heavy decoding paths while still aggregating features at different levels of context, can outperform more complicated networks. Cross-validated experiments on a dataset of 135 esophageal cancer patients demonstrate that our encoded spatial context approach can produce concrete performance improvements, with an average Dice score of {\$}{\$}83.9{\backslash}pm 5.4{\backslash}{\%}{\$}{\$}83.9{\textpm}5.4{\%}and an average surface distance of {\$}{\$}4.2{\backslash}pm 2.7{\backslash},{\backslash}mathrm {\{}mm{\}}{\$}{\$}4.2{\textpm}2.7mm, representing improvements of {\$}{\$}3.8{\backslash}{\%}{\$}{\$}3.8{\%}and {\$}{\$}2.4{\backslash},{\backslash}mathrm {\{}mm{\}}{\$}{\$}2.4mm, respectively, over the state-of-the-art approach.",
isbn="978-3-030-32226-7"
}


@InProceedings{RFB15a,
  author       = "O. Ronneberger and P.Fischer and T. Brox",
  title        = "U-Net: Convolutional Networks for Biomedical Image Segmentation",
  booktitle    = "Medical Image Computing and Computer-Assisted Intervention (MICCAI)",
  series       = "LNCS",
  volume       = "9351",
  pages        = "234--241",
  year         = "2015",
  publisher    = "Springer",
  note         = "(available on arXiv:1505.04597 [cs.CV])",
 
}


@INPROCEEDINGS{7472666,
author={Z. {Zhang} and F. {Ringeval} and B. {Dong} and E. {Coutinho} and E. {Marchi} and B. {Schüller}},
booktitle={2016 IEEE International Conference on Acoustics, Speech and Signal Processing (ICASSP)},
title={Enhanced semi-supervised learning for multimodal emotion recognition},
year={2016},
volume={},
number={},
pages={5185-5189},
keywords={emotion recognition;learning (artificial intelligence);enhanced semisupervised learning;multimodal emotion recognition;supervised phase;automatically labeled instances;Emotion recognition;Databases;Training;Semisupervised learning;Silicon;Robustness;Speech;Multimodal emotion recognition;enhanced semi-supervised learning},
doi={10.1109/ICASSP.2016.7472666},
ISSN={},
month={March},}

@article{Lee_2013,
author = {Lee, Dong-Hyun},
year = {2013},
month = {07},
pages = {},
title = {Pseudo-Label : The Simple and Efficient Semi-Supervised Learning Method for Deep Neural Networks},
journal = {ICML 2013 Workshop : Challenges in Representation Learning (WREPL)}
}

@article{roth2019liver,
  title={Liver Lesion Segmentation with slice-wise 2D Tiramisu and Tversky loss function},
  author={Roth, Karsten and Konopczy{\'n}ski, Tomasz and Hesser, J{\"u}rgen},
  journal={arXiv preprint arXiv:1905.03639},
  year={2019}
}

@article{isensee2018nnu,
  title={nnu-net: Self-adapting framework for u-net-based medical image segmentation},
  author={Isensee, Fabian and Petersen, Jens and Klein, Andre and Zimmerer, David and Jaeger, Paul F and Kohl, Simon and Wasserthal, Jakob and Koehler, Gregor and Norajitra, Tobias and Wirkert, Sebastian and others},
  journal={arXiv preprint arXiv:1809.10486},
  year={2018}
}

@article{han2017automatic,
  title={Automatic liver lesion segmentation using a deep convolutional neural network method},
  author={Han, Xiao},
  journal={arXiv preprint arXiv:1704.07239},
  year={2017}
}
@inproceedings{milletari2016v,
  title={V-net: Fully convolutional neural networks for volumetric medical image segmentation},
  author={Milletari, Fausto and Navab, Nassir and Ahmadi, Seyed-Ahmad},
  booktitle={2016 Fourth International Conference on 3D Vision (3DV)},
  pages={565--571},
  year={2016},
  organization={IEEE}
}

@misc{tajbakhsh2019embracing,
    title={Embracing Imperfect Datasets: A Review of Deep Learning Solutions for Medical Image Segmentation},
    author={Nima Tajbakhsh and Laura Jeyaseelan and Qian Li and Jeffrey Chiang and Zhihao Wu and Xiaowei Ding},
    year={2019},
    eprint={1908.10454},
    archivePrefix={arXiv},
    primaryClass={eess.IV}
}


@ARTICLE{8045995, 
author={Q. {Zhang} and Y. {Fan} and J. {Wan} and Y. {Liu}}, 
journal={IEEE Access}, 
title={An Efficient and Clinical-Oriented 3D Liver Segmentation Method}, 
year={2017}, 
volume={5}, 
number={}, 
pages={18737-18744}, 
keywords={blood vessels;computerised tomography;diseases;image segmentation;liver;medical image processing;tumours;computed tomography sequence data;intrahepatic vein;liver anatomy;anatomical liver resection;semiautomatic method;portal vein branches;automatic segmentation;portal vein blood supply;liver volume;Couinaud theory;clinical-oriented 3D liver segmentation method;Liver;Image segmentation;Veins;Portals;Surgery;Three-dimensional displays;Computed tomography;Liver anatomy;CT image segmentation and reconstruction;3D Visualization;Couinaud’s segments;vascular tree of portal vein}, 
doi={10.1109/ACCESS.2017.2754298}, 
ISSN={}, 
month={},}


@inproceedings{wang_pairwise_2019,
	address = {Cham},
	title = {Pairwise {Semantic} {Segmentation} via {Conjugate} {Fully} {Convolutional} {Network}},
	isbn = {978-3-030-32226-7},
	abstract = {Semantic segmentation has been popularly addressed using fully convolutional networks (FCNs) with impressive results if the training set is diverse and large enough. However, FCNs often fail to achieve satisfactory results due to a limited number of manually labelled samples in medical imaging. In this paper, we propose a conjugate fully convolutional network (CFCN) to address this challenging problem. CFCN is a novel framework where pairwise samples are input and synergistically segmented in the network for capturing a rich context representation. To avoid overfitting introduced by appearance and shape changes in a small number of training samples, a fusion module is designed to provide proxy supervision for the network training process. Quantitative evaluation shows that the proposed method has a significant performance improvement on pathological liver segmentation.},
	booktitle = {Medical {Image} {Computing} and {Computer} {Assisted} {Intervention} – {MICCAI} 2019},
	publisher = {Springer International Publishing},
	author = {Wang, Renzhen and Cao, Shilei and Ma, Kai and Meng, Deyu and Zheng, Yefeng},
	editor = {Shen, Dinggang and Liu, Tianming and Peters, Terry M. and Staib, Lawrence H. and Essert, Caroline and Zhou, Sean and Yap, Pew-Thian and Khan, Ali},
	year = {2019},
	keywords = {Liver, Semantic Segmentation},
	pages = {157--165}
}

@article{Maria_2004,
author = {Oliva, Maria and Saini, Sanjay},
year = {2004},
month = {02},
pages = {S42-6},
title = {Liver cancer imaging: role of CT, MRI, US and PET},
volume = {4 Spec No A},
journal = {Cancer imaging : the official publication of the International Cancer Imaging Society},
doi = {10.1102/1470-7330.2004.0011}
}

@article{bilic_liver_2019,
	title = {The {Liver} {Tumor} {Segmentation} {Benchmark} ({LiTS})},
	url = {http://arxiv.org/abs/1901.04056},
	abstract = {In this work, we report the set-up and results of the Liver Tumor Segmentation Benchmark (LITS) organized in conjunction with the IEEE International Symposium on Biomedical Imaging (ISBI) 2016 and International Conference On Medical Image Computing Computer Assisted Intervention (MICCAI) 2017. Twenty four valid state-of-the-art liver and liver tumor segmentation algorithms were applied to a set of 131 computed tomography (CT) volumes with different types of tumor contrast levels (hyper-/hypo-intense), abnormalities in tissues (metastasectomie) size and varying amount of lesions. The submitted algorithms have been tested on 70 undisclosed volumes. The dataset is created in collaboration with seven hospitals and research institutions and manually reviewed by independent three radiologists. We found that not a single algorithm performed best for liver and tumors. The best liver segmentation algorithm achieved a Dice score of 0.96(MICCAI) whereas for tumor segmentation the best algorithm evaluated at 0.67(ISBI) and 0.70(MICCAI). The LITS image data and manual annotations continue to be publicly available through an online evaluation system as an ongoing benchmarking resource.},
	urldate = {2019-10-23},
	journal = {arXiv:1901.04056 [cs]},
	author = {Bilic, Patrick and Christ, Patrick Ferdinand and Vorontsov, Eugene and Chlebus, Grzegorz and Chen, Hao and Dou, Qi and Fu, Chi-Wing and Han, Xiao and Heng, Pheng-Ann and Hesser, Jürgen and Kadoury, Samuel and Konopczynski, Tomasz and Le, Miao and Li, Chunming and Li, Xiaomeng and Lipkovà, Jana and Lowengrub, John and Meine, Hans and Moltz, Jan Hendrik and Pal, Chris and Piraud, Marie and Qi, Xiaojuan and Qi, Jin and Rempfler, Markus and Roth, Karsten and Schenk, Andrea and Sekuboyina, Anjany and Vorontsov, Eugene and Zhou, Ping and Hülsemeyer, Christian and Beetz, Marcel and Ettlinger, Florian and Gruen, Felix and Kaissis, Georgios and Lohöfer, Fabian and Braren, Rickmer and Holch, Julian and Hofmann, Felix and Sommer, Wieland and Heinemann, Volker and Jacobs, Colin and Mamani, Gabriel Efrain Humpire and van Ginneken, Bram and Chartrand, Gabriel and Tang, An and Drozdzal, Michal and Ben-Cohen, Avi and Klang, Eyal and Amitai, Marianne M. and Konen, Eli and Greenspan, Hayit and Moreau, Johan and Hostettler, Alexandre and Soler, Luc and Vivanti, Refael and Szeskin, Adi and Lev-Cohain, Naama and Sosna, Jacob and Joskowicz, Leo and Menze, Bjoern H.},
	month = jan,
	year = {2019},
	note = {arXiv: 1901.04056},
	keywords = {Computer Science - Computer Vision and Pattern Recognition},
	file = {arXiv Fulltext PDF:/home/adam/Zotero/storage/35G5JC89/Bilic et al. - 2019 - The Liver Tumor Segmentation Benchmark (LiTS).pdf:application/pdf;arXiv.org Snapshot:/home/adam/Zotero/storage/HRP2ZKGP/1901.html:text/html}
}

@article{gotra_liver_2017,
	title = {Liver segmentation: indications, techniques and future directions},
	volume = {8},
	issn = {1869-4101},
	url = {https://doi.org/10.1007/s13244-017-0558-1},
	doi = {10.1007/s13244-017-0558-1},
	abstract = {Liver volumetry has emerged as an important tool in clinical practice. Liver volume is assessed primarily via organ segmentation of computed tomography (CT) and magnetic resonance imaging (MRI) images. The goal of this paper is to provide an accessible overview of liver segmentation targeted at radiologists and other healthcare professionals.},
	number = {4},
	journal = {Insights into Imaging},
	author = {Gotra, Akshat and Sivakumaran, Lojan and Chartrand, Gabriel and Vu, Kim-Nhien and Vandenbroucke-Menu, Franck and Kauffmann, Claude and Kadoury, Samuel and Gallix, Benoît and de Guise, Jacques A. and Tang, An},
	month = aug,
	year = {2017},
	keywords = {Liver},
	pages = {377--392}
}

@article{Chen_2016,
  title={DeepLab: Semantic Image Segmentation with Deep Convolutional Nets, Atrous Convolution, and Fully Connected CRFs},
  author={Liang-Chieh Chen and George Papandreou and Iasonas Kokkinos and Kevin Murphy and Alan L Yuille},
  journal={arXiv:1606.00915},
  year={2016}
}


@article{Roth_2018,
title = "Spatial aggregation of holistically-nested convolutional neural networks for automated pancreas localization and segmentation",
journal = "Medical Image Analysis",
volume = "45",
pages = "94 - 107",
year = "2018",
issn = "1361-8415",
doi = "https://doi.org/10.1016/j.media.2018.01.006",
url = "http://www.sciencedirect.com/science/article/pii/S1361841518300215",
author = "Holger R. Roth and Le Lu and Nathan Lay and Adam P. Harrison and Amal Farag and Andrew Sohn and Ronald M. Summers",
keywords = "Fully convolutional networks, Holistically nested networks, Deep learning, Medical imaging, Computed tomography, Pancreas segmentation",

}

@InProceedings{Roth_2015,
author="Roth, Holger R.
and Lu, Le
and Farag, Amal
and Shin, Hoo-Chang
and Liu, Jiamin
and Turkbey, Evrim B.
and Summers, Ronald M.",
editor="Navab, Nassir
and Hornegger, Joachim
and Wells, William M.
and Frangi, Alejandro",
title="DeepOrgan: Multi-level Deep Convolutional Networks for Automated Pancreas Segmentation",
booktitle="Medical Image Computing and Computer-Assisted Intervention -- MICCAI 2015",
year="2015",
publisher="Springer International Publishing",
address="Cham",
pages="556--564",
abstract="Automatic organ segmentation is an important yet challenging problem for medical image analysis. The pancreas is an abdominal organ with very high anatomical variability. This inhibits previous segmentation methods from achieving high accuracies, especially compared to other organs such as the liver, heart or kidneys. In this paper, we present a probabilistic bottom-up approach for pancreas segmentation in abdominal computed tomography (CT) scans, using multi-level deep convolutional networks (ConvNets). We propose and evaluate several variations of deep ConvNets in the context of hierarchical, coarse-to-fine classification on image patches and regions, i.e. superpixels. We first present a dense labeling of local image patches via P-ConvNet and nearest neighbor fusion. Then we describe a regional ConvNet (R				1−ConvNet) that samples a set of bounding boxes around each image superpixel at different scales of contexts in a ``zoom-out'' fashion. Our ConvNets learn to assign class probabilities for each superpixel region of being pancreas. Last, we study a stacked R				2−ConvNet leveraging the joint space of CT intensities and the P−ConvNet dense probability maps. Both 3D Gaussian smoothing and 2D conditional random fields are exploited as structured predictions for post-processing. We evaluate on CT images of patients in 4-fold cross-validation. We achieve a Dice Similarity Coefficient of 83.6{\textpm}6.3{\%} in training and 71.8{\textpm}10.7{\%} in testing.",
isbn="978-3-319-24553-9"
}


@article{li2018h,
  title={H-DenseUNet: hybrid densely connected UNet for liver and tumor segmentation from CT volumes},
  author={Li, Xiaomeng and Chen, Hao and Qi, Xiaojuan and Dou, Qi and Fu, Chi-Wing and Heng, Pheng-Ann},
  journal={IEEE transactions on medical imaging},
  volume={37},
  number={12},
  pages={2663--2674},
  year={2018},
  publisher={IEEE}
}

@inproceedings{zhanglight,
  title     = {Light-Weight Hybrid Convolutional Network for Liver Tumor Segmentation},
  author    = {Zhang, Jianpeng and Xie, Yutong and Zhang, Pingping and Chen, Hao and Xia, Yong and Shen, Chunhua},
  booktitle = {Proceedings of the Twenty-Eighth International Joint Conference on
               Artificial Intelligence, {IJCAI-19}},
  publisher = {International Joint Conferences on Artificial Intelligence Organization},             
  pages     = {4271--4277},
  year      = {2019},
  month     = {7},
  doi       = {10.24963/ijcai.2019/593},
 
}


@inproceedings{zhou2019semi,
  title={Semi-supervised 3D abdominal multi-organ segmentation via deep multi-planar co-training},
  author={Zhou, Yuyin and Wang, Yan and Tang, Peng and Bai, Song and Shen, Wei and Fishman, Elliot and Yuille, Alan},
  booktitle={2019 IEEE Winter Conference on Applications of Computer Vision (WACV)},
  pages={121--140},
  year={2019},
  organization={IEEE}
}
@inproceedings{radosavovic2018data,
  title={Data distillation: Towards omni-supervised learning},
  author={Radosavovic, Ilija and Doll{\'a}r, Piotr and Girshick, Ross and Gkioxari, Georgia and He, Kaiming},
  booktitle={Proceedings of the IEEE Conference on Computer Vision and Pattern Recognition},
  pages={4119--4128},
  year={2018}
}

@inproceedings{qiao2018deep,
  title={Deep co-training for semi-supervised image recognition},
  author={Qiao, Siyuan and Shen, Wei and Zhang, Zhishuai and Wang, Bo and Yuille, Alan},
  booktitle={Proceedings of the European Conference on Computer Vision (ECCV)},
  pages={135--152},
  year={2018}
}
@inproceedings{blum1998combining,
  title={Combining labeled and unlabeled data with co-training},
  author={Blum, Avrim and Mitchell, Tom},
  booktitle={Proceedings of the eleventh annual conference on Computational learning theory},
  pages={92--100},
  year={1998},
  organization={Citeseer}
}

@article{xia20183d,
  title={3D Semi-Supervised Learning with Uncertainty-Aware Multi-View Co-Training},
  author={Xia, Yingda and Liu, Fengze and Yang, Dong and Cai, Jinzheng and Yu, Lequan and Zhu, Zhuotun and Xu, Daguang and Yuille, Alan and Roth, Holger},
  journal={arXiv preprint arXiv:1811.12506},
  year={2018}
}
@inproceedings{tsai2018learning,
  title={Learning to adapt structured output space for semantic segmentation},
  author={Tsai, Yi-Hsuan and Hung, Wei-Chih and Schulter, Samuel and Sohn, Kihyuk and Yang, Ming-Hsuan and Chandraker, Manmohan},
  booktitle={Proceedings of the IEEE Conference on Computer Vision and Pattern Recognition},
  pages={7472--7481},
  year={2018}
}
@inproceedings{vu2019advent,
  title={Advent: Adversarial entropy minimization for domain adaptation in semantic segmentation},
  author={Vu, Tuan-Hung and Jain, Himalaya and Bucher, Maxime and Cord, Matthieu and P{\'e}rez, Patrick},
  booktitle={Proceedings of the IEEE Conference on Computer Vision and Pattern Recognition},
  pages={2517--2526},
  year={2019}
}
@inproceedings{chen2019crdoco,
  title={CrDoCo: Pixel-Level Domain Transfer With Cross-Domain Consistency},
  author={Chen, Yun-Chun and Lin, Yen-Yu and Yang, Ming-Hsuan and Huang, Jia-Bin},
  booktitle={Proceedings of the IEEE Conference on Computer Vision and Pattern Recognition},
  pages={1791--1800},
  year={2019}
}
@inproceedings{chang2019all,
  title={All about Structure: Adapting Structural Information across Domains for Boosting Semantic Segmentation},
  author={Chang, Wei-Lun and Wang, Hui-Po and Peng, Wen-Hsiao and Chiu, Wei-Chen},
  booktitle={Proceedings of the IEEE Conference on Computer Vision and Pattern Recognition},
  pages={1900--1909},
  year={2019}
}

@article{He2015DeepRL,
  title={Deep Residual Learning for Image Recognition},
  author={Kaiming He and Xiangyu Zhang and Shaoqing Ren and Jian Sun},
  journal={2016 IEEE Conference on Computer Vision and Pattern Recognition (CVPR)},
  year={2015},
  pages={770-778}
}

@INPROCEEDINGS{8035318, 
author={C. {Kuo} and S. {Cheng} and C. {Lin} and K. {Hsiao} and S. {Lee}}, 
booktitle={2017 International Conference on Computer, Information and Telecommunication Systems (CITS)}, 
title={Texture-based treatment prediction by automatic liver tumor segmentation on computed tomography}, 
year={2017}, 
volume={}, 
number={}, 
pages={128-132}, 
keywords={computerised tomography;data mining;feature extraction;image segmentation;image texture;liver;medical image processing;patient treatment;regression analysis;sampling methods;support vector machines;tumours;vectors;treatment prediction;automatic liver tumor segmentation;computed tomography scans;CT scans;texture feature extraction;image segmentation;random sampling;feature point;region of interest;ROI;gray-level co-occurrence matrix;GLCM;texture feature vector;support vector machine;SVM;survival prediction mining;logistic regression;Liver;Tumors;Computed tomography;Image segmentation;Feature extraction;Training;Support vector machines;CT images;region-of-interest;liver tumor;texture-based treatment prediction}, 
doi={10.1109/CITS.2017.8035318}, 
ISSN={}, 
month={July},}
@inproceedings{vorontsov2014metastatic,
  title={Metastatic liver tumor segmentation using texture-based omni-directional deformable surface models},
  author={Vorontsov, Eugene and Abi-Jaoudeh, Nadine and Kadoury, Samuel},
  booktitle={International MICCAI Workshop on Computational and Clinical Challenges in Abdominal Imaging},
  pages={74--83},
  year={2014},
  organization={Springer}
}
@article{conze2017scale,
  title={Scale-adaptive supervoxel-based random forests for liver tumor segmentation in dynamic contrast-enhanced CT scans},
  author={Conze, Pierre-Henri and Noblet, Vincent and Rousseau, Fran{\c{c}}ois and Heitz, Fabrice and De Blasi, Vito and Memeo, Riccardo and Pessaux, Patrick},
  journal={International journal of computer assisted radiology and surgery},
  volume={12},
  number={2},
  pages={223--233},
  year={2017},
  publisher={Springer}
}
@INPROCEEDINGS{8363576, 
author={M. {Frid-Adar} and E. {Klang} and M. {Amitai} and J. {Goldberger} and H. {Greenspan}}, 
booktitle={2018 IEEE 15th International Symposium on Biomedical Imaging (ISBI 2018)}, 
title={Synthetic data augmentation using GAN for improved liver lesion classification}, 
year={2018}, 
volume={}, 
number={}, 
pages={289-293}, 
keywords={cancer;computerised tomography;image classification;liver;medical image processing;tumours;synthetic data augmentation;data augmentation method;synthetic medical images;classic data augmentation;generative adversarial networks;liver lesion classification;computed tomography images;Lesions;Liver;Gallium nitride;Training;Medical diagnostic imaging;Task analysis;Image synthesis;data augmentation;generative adversarial network;liver lesions;lesion classification}, 
doi={10.1109/ISBI.2018.8363576}, 
ISSN={}, 
month={April},}

@article{ben2019cross,
  title={Cross-modality synthesis from CT to PET using FCN and GAN networks for improved automated lesion detection},
  author={Ben-Cohen, Avi and Klang, Eyal and Raskin, Stephen P and Soffer, Shelly and Ben-Haim, Simona and Konen, Eli and Amitai, Michal Marianne and Greenspan, Hayit},
  journal={Engineering Applications of Artificial Intelligence},
  volume={78},
  pages={186--194},
  year={2019},
  publisher={Elsevier}
}
@inproceedings{havaei2016hemis,
  title={Hemis: Hetero-modal image segmentation},
  author={Havaei, Mohammad and Guizard, Nicolas and Chapados, Nicolas and Bengio, Yoshua},
  booktitle={International Conference on Medical Image Computing and Computer-Assisted Intervention},
  pages={469--477},
  year={2016},
  organization={Springer}
}
@article{chartsias2017multimodal,
  title={Multimodal MR synthesis via modality-invariant latent representation},
  author={Chartsias, Agisilaos and Joyce, Thomas and Giuffrida, Mario Valerio and Tsaftaris, Sotirios A},
  journal={IEEE transactions on medical imaging},
  volume={37},
  number={3},
  pages={803--814},
  year={2017},
  publisher={IEEE}
}


@InProceedings{Zhou_2018_fusion,
author="Zhou, Yuyin
and Li, Yingwei
and Zhang, Zhishuai
and Wang, Yan
and Wang, Angtian
and Fishman, Elliot K.
and Yuille, Alan L.
and Park, Seyoun",
editor="Shen, Dinggang
and Liu, Tianming
and Peters, Terry M.
and Staib, Lawrence H.
and Essert, Caroline
and Zhou, Sean
and Yap, Pew-Thian
and Khan, Ali",
title="Hyper-Pairing Network for Multi-phase Pancreatic Ductal Adenocarcinoma Segmentation",
booktitle="Medical Image Computing and Computer Assisted Intervention -- MICCAI 2019",
year="2019",
publisher="Springer International Publishing",
address="Cham",
pages="155--163",
abstract="Pancreatic ductal adenocarcinoma (PDAC) is one of the most lethal cancers with an overall five-year survival rate of 8{\%}. Due to subtle texture changes of PDAC, pancreatic dual-phase imaging is recommended for better diagnosis of pancreatic disease. In this study, we aim at enhancing PDAC automatic segmentation by integrating multi-phase information (i.e., arterial phase and venous phase). To this end, we present Hyper-Pairing Network (HPN), a 3D fully convolution neural network which effectively integrates information from different phases. The proposed approach consists of a dual path network where the two parallel streams are interconnected with hyper-connections for intensive information exchange. Additionally, a pairing loss is added to encourage the commonality between high-level feature representations of different phases. Compared to prior arts which use single phase data, HPN reports a significant improvement up to 7.73{\%} (from 56.21{\%} to 63.94{\%}) in terms of DSC.",
isbn="978-3-030-32245-8"
}


@article{paszke2017automatic,
  title={Automatic differentiation in pytorch},
  author={Paszke, Adam and Gross, Sam and Chintala, Soumith and Chanan, Gregory and Yang, Edward and DeVito, Zachary and Lin, Zeming and Desmaison, Alban and Antiga, Luca and Lerer, Adam},
  year={2017}
}
@article{bilic2019liver,
  title={The liver tumor segmentation benchmark (lits)},
  author={Bilic, Patrick and Christ, Patrick Ferdinand and Vorontsov, Eugene and Chlebus, Grzegorz and Chen, Hao and Dou, Qi and Fu, Chi-Wing and Han, Xiao and Heng, Pheng-Ann and Hesser, J{\"u}rgen and others},
  journal={arXiv preprint arXiv:1901.04056},
  year={2019}
}
@ARTICLE{4781564,
author={T. {Heimann} and B. {van Ginneken} and M. A. {Styner} and Y. {Arzhaeva} and V. {Aurich} and C. {Bauer} and A. {Beck} and C. {Becker} and R. {Beichel} and G. {Bekes} and F. {Bello} and G. {Binnig} and H. {Bischof} and A. {Bornik} and P. M. M. {Cashman} and Y. {Chi} and A. {Cordova} and B. M. {Dawant} and M. {Fidrich} and J. D. {Furst} and D. {Furukawa} and L. {Grenacher} and J. {Hornegger} and D. {KainmÜller} and R. I. {Kitney} and H. {Kobatake} and H. {Lamecker} and T. {Lange} and J. {Lee} and B. {Lennon} and R. {Li} and S. {Li} and H. {Meinzer} and G. {Nemeth} and D. S. {Raicu} and A. {Rau} and E. M. {van Rikxoort} and M. {Rousson} and L. {Rusko} and K. A. {Saddi} and G. {Schmidt} and D. {Seghers} and A. {Shimizu} and P. {Slagmolen} and E. {Sorantin} and G. {Soza} and R. {Susomboon} and J. M. {Waite} and A. {Wimmer} and I. {Wolf}},
journal={IEEE Transactions on Medical Imaging},
title={Comparison and Evaluation of Methods for Liver Segmentation From CT Datasets},
year={2009},
volume={28},
number={8},
pages={1251-1265},
keywords={computerised tomography;diagnostic radiography;error analysis;feature extraction;graph theory;image enhancement;image registration;image segmentation;liver;medical image processing;set theory;statistical analysis;CT dataset;liver segmentation evaluation;automatic interactive method;contrast-enhanced CT image;MICCAI 2007 Grand Challenge workshop;algorithm evaluation;additional proprietary training data;statistical shape model;atlas registration;level-set method;rule-based system;error measurement;image feature automatic approach;graph-cut method;computerised tomography;Liver;Image segmentation;Computed tomography;Shape;Image databases;Training data;Testing;Knowledge based systems;Humans;Deformable models;Evaluation;liver;segmentation;Algorithms;Bayes Theorem;Databases, Factual;Humans;Image Processing, Computer-Assisted;Liver;Tomography, X-Ray Computed},
doi={10.1109/TMI.2009.2013851},
ISSN={},
month={Aug},}
@article{roth2018spatial,
  title={Spatial aggregation of holistically-nested convolutional neural networks for automated pancreas localization and segmentation},
  author={Roth, Holger R and Lu, Le and Lay, Nathan and Harrison, Adam P and Farag, Amal and Sohn, Andrew and Summers, Ronald M},
  journal={Medical image analysis},
  volume={45},
  pages={94--107},
  year={2018},
  publisher={Elsevier}
}
@incollection{ben2016fully,
  title={Fully convolutional network for liver segmentation and lesions detection},
  author={Ben-Cohen, Avi and Diamant, Idit and Klang, Eyal and Amitai, Michal and Greenspan, Hayit},
  booktitle={Deep learning and data labeling for medical applications},
  pages={77--85},
  year={2016},
  publisher={Springer}
}
@inproceedings{yang2017automatic,
  title={Automatic liver segmentation using an adversarial image-to-image network},
  author={Yang, Dong and Xu, Daguang and Zhou, S Kevin and Georgescu, Bogdan and Chen, Mingqing and Grbic, Sasa and Metaxas, Dimitris and Comaniciu, Dorin},
  booktitle={International Conference on Medical Image Computing and Computer-Assisted Intervention},
  pages={507--515},
  year={2017},
  organization={Springer}
}
@inproceedings{zhang2018self,
  title={Self-learning to detect and segment cysts in lung CT images without manual annotation},
  author={Zhang, Ling and Gopalakrishnan, Vissagan and Lu, Le and Summers, Ronald M and Moss, Joel and Yao, Jianhua},
  booktitle={2018 IEEE 15th International Symposium on Biomedical Imaging (ISBI 2018)},
  pages={1100--1103},
  year={2018},
  organization={IEEE}
}
@inproceedings{bai2017semi,
  title={Semi-supervised learning for network-based cardiac MR image segmentation},
  author={Bai, Wenjia and Oktay, Ozan and Sinclair, Matthew and Suzuki, Hideaki and Rajchl, Martin and Tarroni, Giacomo and Glocker, Ben and King, Andrew and Matthews, Paul M and Rueckert, Daniel},
  booktitle={International Conference on Medical Image Computing and Computer-Assisted Intervention},
  pages={253--260},
  year={2017},
  organization={Springer}
}
@article{min2019two,
  title={A Two-Stream Mutual Attention Network for Semi-supervised Biomedical Segmentation with Noisy Labels},
  author={Min, Shaobo and Chen, Xuejin and Zha, Zheng-Jun and Wu, Feng and Zhang, Yongdong},
  year={2019}
}
@article{soler20103d,
  title={3D image reconstruction for comparison of algorithm database: A patient specific anatomical and medical image database},
  author={Soler, L and Hostettler, A and Agnus, V and Charnoz, A and Fasquel, JB and Moreau, J and Osswald, A and Bouhadjar, M and Marescaux, J},
  journal={IRCAD, Strasbourg, France, Tech. Rep},
  year={2010}
}

@online{chaos,
  author = {chaos},
  title = {CHAOS - Combined (CT-MR) Healthy Abdominal Organ Segmentation},
  year = 2019,
  url = {https://chaos.grand-challenge.org/Combined\_Healthy\_Abdominal\_Organ\_Segmentation}
}

@article{Heinrich2013MRFBasedDR,
  title={MRF-Based Deformable Registration and Ventilation Estimation of Lung CT},
  author={Mattias P. Heinrich and Mark Jenkinson and Michael Brady and Julia A. Schnabel},
  journal={IEEE Transactions on Medical Imaging},
  year={2013},
  volume={32},
  pages={1239-1248}
}

@InProceedings{Garderen_2019,
author="van Garderen, Karin
and Smits, Marion
and Klein, Stefan",
editor="Wang, Qian
and Milletari, Fausto
and Nguyen, Hien V.
and Albarqouni, Shadi
and Cardoso, M. Jorge
and Rieke, Nicola
and Xu, Ziyue
and Kamnitsas, Konstantinos
and Patel, Vishal
and Roysam, Badri
and Jiang, Steve
and Zhou, Kevin
and Luu, Khoa
and Le, Ngan",
title="Multi-modal Segmentation with Missing MR Sequences Using Pre-trained Fusion Networks",
booktitle="Domain Adaptation and Representation Transfer and Medical Image Learning with Less Labels and Imperfect Data",
year="2019",
publisher="Springer International Publishing",
address="Cham",
pages="165--172",
abstract="Missing data is a common problem in machine learning and in retrospective imaging research it is often encountered in the form of missing imaging modalities. We propose to take into account missing modalities in the design and training of neural networks, to ensure that they are capable of providing the best possible prediction even when multiple images are not available. The proposed network combines three modifications to the standard 3D UNet architecture: a training scheme with dropout of modalities, a multi-pathway architecture with fusion layer in the final stage, and the separate pre-training of these pathways. These modifications are evaluated incrementally in terms of performance on full and missing data, using the BraTS multi-modal segmentation challenge. The final model shows significant improvement with respect to the state of the art on missing data and requires less memory during training.",
isbn="978-3-030-33391-1"
}

@dataset{gibson_eli_2018_1169361,
  author       = {Gibson, Eli and
                  Giganti, Francesco and
                  Hu, Yipeng and
                  Bonmati, Ester and
                  Bandula, Steve and
                  Gurusamy, Kurinchi and
                  Davidson, Brian and
                  Pereira, Stephen P. and
                  Clarkson, Matthew J. and
                  Barratt, Dean C.},
  title        = {{Multi-organ Abdominal CT Reference Standard 
                   Segmentations}},
  month        = feb,
  year         = 2018,
  note         = {{This data set was developed as part of independent 
                   research supported by Cancer Research UK
                   (Multidisciplinary C28070/A19985) and the National
                   Institute for Health Research UCL/UCL Hospitals
                   Biomedical Research Centre.}},
  publisher    = {Zenodo},
  version      = {1.0},
  doi          = {10.5281/zenodo.1169361},
  url          = {https://doi.org/10.5281/zenodo.1169361}
}

@InProceedings{Zhou_2019,
author="Zhou, Bo
and Harrison, Adam P.
and Yao, Jiawen
and Cheng, Chi-Tung
and Xiao, Jing
and Liao, Chien-Hung
and Lu, Le",
editor="Wang, Qian
and Milletari, Fausto
and Nguyen, Hien V.
and Albarqouni, Shadi
and Cardoso, M. Jorge
and Rieke, Nicola
and Xu, Ziyue
and Kamnitsas, Konstantinos
and Patel, Vishal
and Roysam, Badri
and Jiang, Steve
and Zhou, Kevin
and Luu, Khoa
and Le, Ngan",
title="CT Data Curation for Liver Patients: Phase Recognition in Dynamic Contrast-Enhanced CT",
booktitle="Domain Adaptation and Representation Transfer and Medical Image Learning with Less Labels and Imperfect Data",
year="2019",
publisher="Springer International Publishing",
address="Cham",
pages="139--147",
abstract="As the demand for more descriptive machine learning models grows within medical imaging, bottlenecks due to data paucity will exacerbate. Thus, collecting enough large-scale data will require automated tools to harvest data/label pairs from messy and real-world datasets, such as hospital picture archiving and communication systems (PACSs). This is the focus of our work, where we present a principled data curation tool to extract multi-phase computed tomography (CT) liver studies and identify each scan's phase from a real-world and heterogenous hospital PACS dataset. Emulating a typical deployment scenario, we first obtain a set of noisy labels from our institutional partners that are text mined using simple rules from DICOM tags. We train a deep learning system, using a customized and streamlined 3D squeeze and excitation (SE) architecture, to identify non-contrast, arterial, venous, and delay phase dynamic CT liver scans, filtering out anything else, including other types of liver contrast studies. To exploit as much training data as possible, we also introduce an aggregated cross entropy loss that can learn from scans only identified as ``contrast''. Extensive experiments on a dataset of 43K scans of 7680 patient imaging studies demonstrate that our 3DSE architecture, armed with our aggregated loss, can achieve a mean F1 of 0.977 and can correctly harvest up to {\$}{\$}92.7{\backslash}{\%}{\$}{\$}92.7{\%}of studies, which significantly outperforms the text-mined and standard-loss approach, and also outperforms other, and more complex, model architectures.",
isbn="978-3-030-33391-1"
}


@article{lin1991divergence,
  title={Divergence measures based on the Shannon entropy},
  author={Lin, Jianhua},
  journal={IEEE Transactions on Information theory},
  volume={37},
  number={1},
  pages={145--151},
  year={1991},
  publisher={IEEE}
}
@inproceedings{he2016deep,
  title={Deep residual learning for image recognition},
  author={He, Kaiming and Zhang, Xiangyu and Ren, Shaoqing and Sun, Jian},
  booktitle={Proceedings of the IEEE conference on computer vision and pattern recognition},
  pages={770--778},
  year={2016}
}
@article{simonyan2014very,
  title={Very deep convolutional networks for large-scale image recognition},
  author={Simonyan, Karen and Zisserman, Andrew},
  journal={arXiv preprint arXiv:1409.1556},
  year={2014}
}
@inproceedings{DBLP:journals/corr/KingmaB14,
  author    = {Diederik P. Kingma and
               Jimmy Ba},
  title     = {Adam: {A} Method for Stochastic Optimization},
  booktitle = {3rd International Conference on Learning Representations, {ICLR} 2015,
               San Diego, CA, USA, May 7-9, 2015, Conference Track Proceedings},
  year      = {2015},
  url       = {http://arxiv.org/abs/1412.6980},
  timestamp = {Thu, 25 Jul 2019 14:25:37 +0200},
  biburl    = {https://dblp.org/rec/bib/journals/corr/KingmaB14},
  bibsource = {dblp computer science bibliography, https://dblp.org}
}
