# Supplementary material
Source: ML conference proceedings conference paper supplement (https://www.ecva.net/papers/eccv_2020/papers_ECCV/html/123680443_ECCV_2020_paper.php)

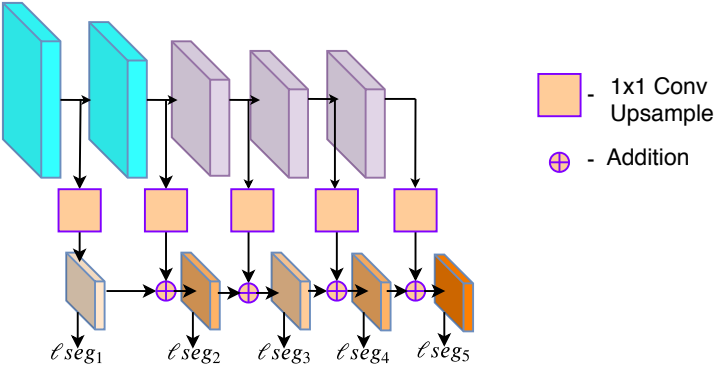

Supplement: Supplementary file 1 [file 123680443-supp.zip]

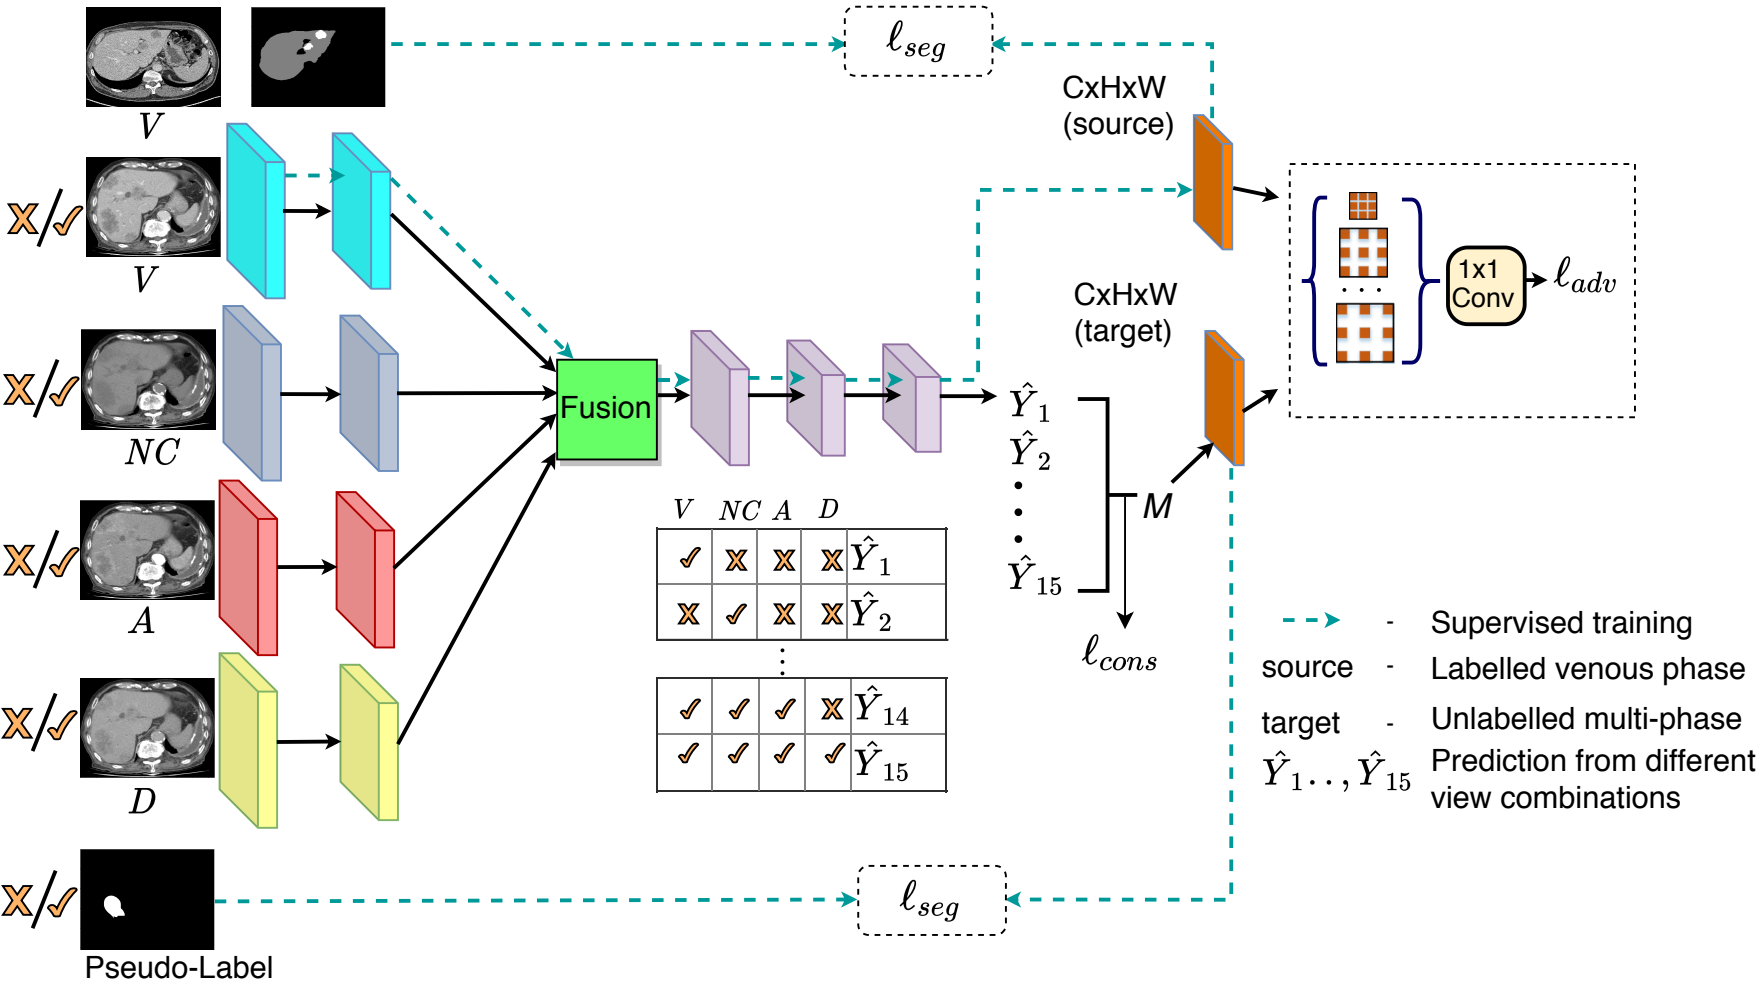

Supplement: Supplementary file 3 [file 123680443-supp.zip]

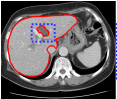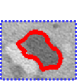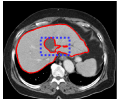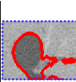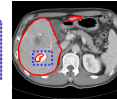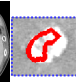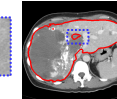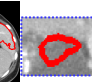

Supplement: Supplementary file 5 [file 123680443-supp.zip]

CHASe

All

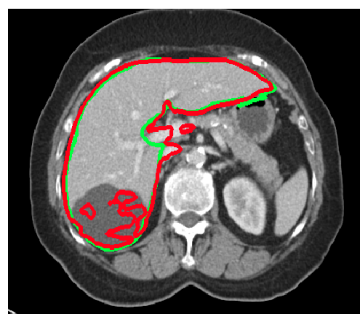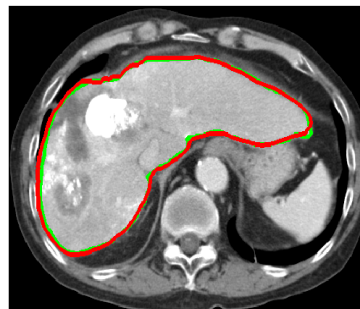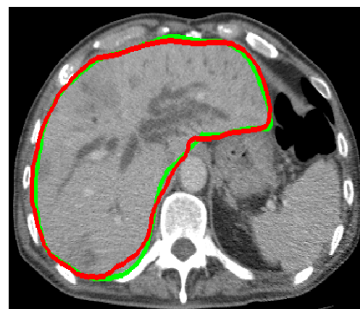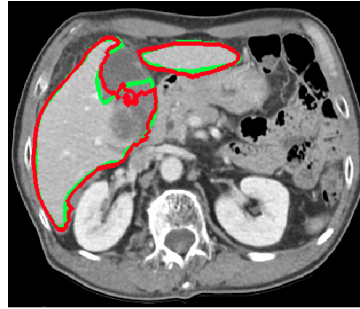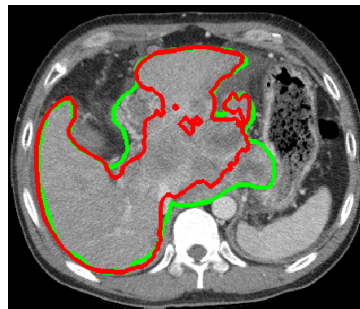

Supplement: Supplementary file 6 [file 123680443-supp.zip]

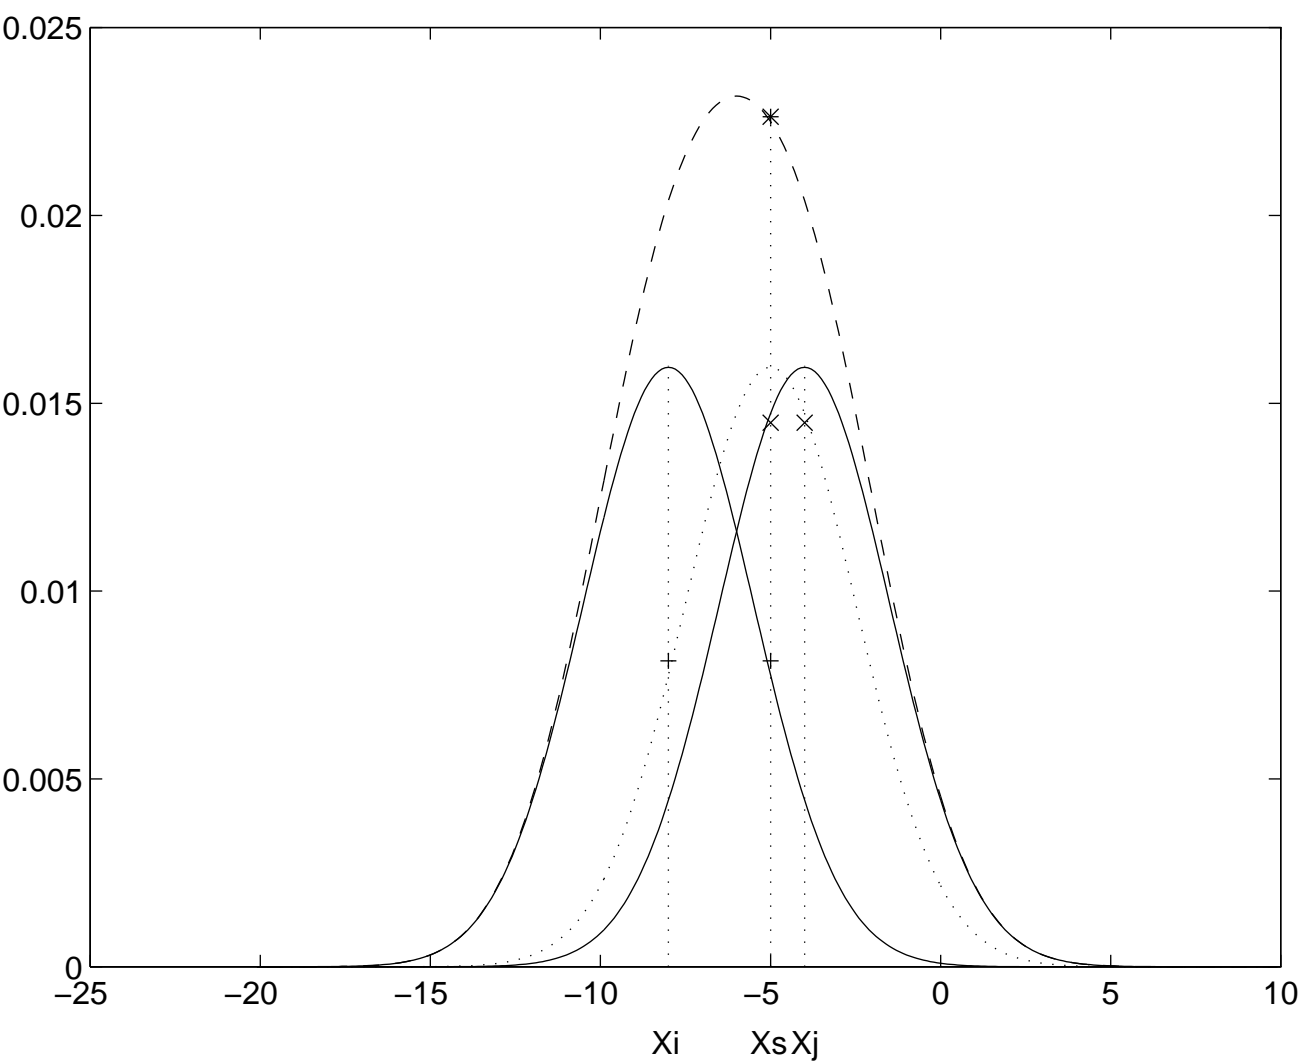

Supplement: Supplementary file 7 [file 123680443-supp.zip › eecv2020_camera_ready/eijkel2.pdf]

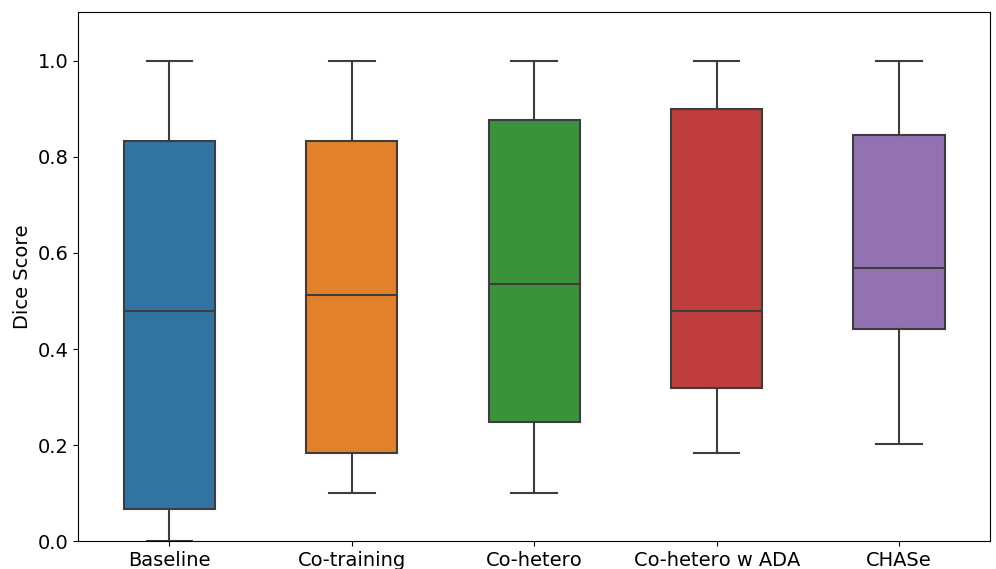

Supplement: Supplementary file 7 [file 123680443-supp.zip › eecv2020_camera_ready/images/lesion_v1.png]
